# Supplementary material
Source: publisher figshare collection journal article supplement (https://sage.figshare.com/ndownloader/files/24154592)
Supplement: Supplementary file 1 [file 24154592]

## Appendix tables

**Table 1: Adjusted and unadjusted B-coefficient for increasing antibiotic prescriptions at various time points by poverty level compared to low poverty zip codes**

|                  | Unadjusted beta-coefficient (95% CI) |                      | Adjusted beta-coefficient (95% CI) |                       |
|------------------|--------------------------------------|----------------------|------------------------------------|-----------------------|
|                  | Medium poverty                       | High poverty         | Medium poverty                     | High poverty          |
| <b>48 hours</b>  | 0.23*<br>(0.02-0.44)                 | 0.31*<br>(0.09-0.54) | 0.12<br>(-0.16-0.39)               | 0.20<br>(-0.11-0.52)  |
| <b>1 week</b>    | 0.14*<br>(0.04-0.24)                 | 0.15*<br>(0.04-0.26) | 0.11<br>(-0.01-0.23)               | 0.11<br>(-0.02-0.24)  |
| <b>1 month</b>   | 0.18*<br>(0.05-0.32)                 | 0.17*<br>(0.02-0.32) | 0.15<br>(-0.02-0.31)               | 0.06<br>(-0.13-0.25)  |
| <b>3 months</b>  | 0.18*<br>(0.00-0.36)                 | 0.15<br>(-0.04-0.35) | 0.15<br>(-0.08-0.38)               | -0.02<br>(-0.28-0.24) |
| <b>6 months</b>  | 0.18<br>(-0.02-0.38)                 | 0.13<br>(-0.09-0.35) | 0.19<br>(-0.06-0.44)               | -0.02<br>(-0.31-0.26) |
| <b>12 months</b> | 0.09<br>(-0.13-0.31)                 | 0.00<br>(-0.24-0.25) | 0.19<br>(-0.10-0.47)               | -0.04<br>(-0.36-0.29) |

\*p<=0.05 and \*\*p=0

Factors adjusted for: NICU stay (yes/no), race/ethnicity (NH white, NH black, Hispanic, Asian, other/unknown), birthweight category (normal, low, high), delivery method (Caesarian section/vaginal), age (grouped into <1, 1-5, 6-10), gender

**Appendix table 2:** multivariate regressions examining relationship between poverty level (low, medium, and high as determined by percent of population in patient zip code of residence living below the poverty line) and visit type; referent=low poverty

|                                          | Unadjusted beta-coefficient (95% CI) |                             | Adjusted beta-coefficient (95% CI) |                       |
|------------------------------------------|--------------------------------------|-----------------------------|------------------------------------|-----------------------|
|                                          | Medium poverty                       | High poverty                | Medium poverty                     | High poverty          |
| <b>Total outpatient visits</b>           | -0.19<br>(-1.60-1.22)                | -2.50*<br>[(-4.06),(-0.94)] | -0.50<br>(-2.18-1.19)              | -1.86<br>(-3.78-0.06) |
| <b>Total inpatient visits</b>            | 0.06<br>(0.00-0.12)                  | 0.10*<br>(0.03-0.17)        | 0.01<br>(-0.06-0.08)               | 0.00<br>(-0.08-0.08)  |
| <b>Total emergency department visits</b> | 0.53**<br>(0.38-0.68)                | 1.24**<br>(1.08-1.41)       | 0.44**<br>(0.24-0.65)              | 0.82**<br>(0.59-1.06) |

\*p<=0.05 and \*\*p=0

Factors adjusted for: race/ethnicity (NH white, NH black, Hispanic, Asian, other/unknown), antibiotics (if patient had ever received), NICU, age, birth weight category (low, high, normal), delivery (vaginal/C-section), gender, obesity, overweight, asthma, eczema, & allergic rhinitis

**Appendix Table 3:** Relationship between race/ethnicity and unadjusted unit increase or decrease in antibiotic usage at various time points

|                      | 48 hours                         | 1 week                | 1 month               | 3 months              | 6 months              | 12 months                |
|----------------------|----------------------------------|-----------------------|-----------------------|-----------------------|-----------------------|--------------------------|
| <b>Poverty level</b> | <b>Beta coefficient (95% CI)</b> |                       |                       |                       |                       |                          |
| <b>Race</b>          |                                  |                       |                       |                       |                       |                          |
| NH White             | 0.0<br>(referent)                | 0.0<br>(referent)     | 0.0<br>(referent)     | 0.0<br>(referent)     | 0.0<br>(referent)     | 0.0<br>(referent)        |
| NH Black             | 0.18<br>(-0.02-0.39)             | 0.04<br>(-0.06-0.14)  | 0.08<br>(-0.06-0.22)  | 0.08<br>(-0.10-0.26)  | -0.02<br>(-0.22-0.18) | -0.17<br>(-0.40-0.05)    |
| Hispanic             | 0.14<br>(-0.03-0.33)             | 0.00<br>(-0.08-0.09)  | 0.11<br>(-0.01-0.23)  | 0.20*<br>(0.06-0.36)  | 0.17<br>(-0.01-0.34)  | 0.00<br>(-0.20-0.19)     |
| Asian                | -0.14<br>(-0.54-0.27)            | -0.05<br>(-0.24-0.15) | -0.10<br>(-0.38-0.17) | -0.19<br>(-0.54-0.16) | -0.30<br>(-0.69-0.10) | -0.48*<br>(-0.91- -0.04) |
| Other/unknown        | -0.08<br>(-0.38-0.22)            | -0.03<br>(-0.17-0.11) | -0.04<br>(-0.24-0.16) | -0.08<br>(-0.33-0.18) | -0.15<br>(-0.44-0.14) | -0.17<br>(-0.49-0.15)    |

**Appendix table 4: Unadjusted odds ratio of receiving at least one dose of antibiotics at various time-points**

|               | <b>48 hours</b>                  | <b>1 week</b>       | <b>1 month</b>      | <b>3 months</b>     | <b>6 months</b>                  | <b>12 months</b>      | <b>Lifetime</b>       |
|---------------|----------------------------------|---------------------|---------------------|---------------------|----------------------------------|-----------------------|-----------------------|
| <b>Race</b>   |                                  |                     |                     |                     |                                  |                       |                       |
| NH White      | 0.0<br>(referent)                | 0.0<br>(referent)   | 0.0<br>(referent)   | 0.0<br>(referent)   | 0.0<br>(referent)                | 0.0<br>(referent)     | referent              |
| NH Black      | 1.17 <sup>c</sup><br>(0.99-1.38) | 1.12<br>(0.96-1.32) | 1.12<br>(0.96-1.32) | 1.07<br>(0.91-1.24) | 0.92<br>(0.79-1.06)              | 0.83*<br>(0.73-0.94)  | 0.77**<br>(0.67-0.89) |
| Hispanic      | 1.07<br>(0.92-1.24)              | 1.08<br>(0.94-1.25) | 1.12<br>(0.98-1.29) | 1.09<br>(0.96-1.25) | 0.96<br>(0.85-1.09)              | 0.84**<br>(0.75-0.94) | 0.81**<br>(0.72-0.91) |
| Asian         | 0.84<br>(0.59-1.19)              | 0.79<br>(0.56-1.12) | 0.82<br>(0.59-1.16) | 0.78<br>(0.56-1.08) | 0.75 <sup>d</sup><br>(0.56-1.02) | 0.73*<br>(0.56-0.95)  | 0.58**<br>(0.45-0.76) |
| Other/unknown | 1.02<br>(0.80-1.306)             | 1.00<br>(0.79-1.27) | 0.97<br>(0.77-1.23) | 0.98<br>(0.78-1.23) | 0.95<br>(0.77-1.17)              | 0.93<br>(0.77-1.12)   | 0.81*<br>(0.67-0.99)  |

\*p<0.05 and \*\*p<0; a= approaching statistical significance (p=0.057); b=approaching statistical significance (p=0.077); c=approaching statistical significance (p=0.063); d=approaching statistical significance (p=0.065)
